# Supplementary material
Source: PubMed Central journal article supplement (PMC9010060)
Supplement: 41906_2022_1246_MOESM1_ESM.pdf [file 41906_2022_1246_MOESM1_ESM.pdf]

## Literatur

### zum Beitrag „Befugt oder nicht? Sauerstoffmessung im Heim“

von Martina Hasseler, Constanze Janda, Andreas Günther, Eileen Czaputa, Uta Weidlich-Wichmann, Anna Larina Lietz, Birgit Hartleb

*PflegeZeitschrift* (75) 5/2022, S. 16-19

§113a SGB XI (2021): Expertenstandards zur Sicherung und Weiterentwicklung der Qualität in der Pflege. Sozialgesetzbuch (SGB XI) Elftes Buch Soziale Pflegeversicherung. Stand: Zuletzt geändert durch Art. 15 G v. 28.3.2021 I 591. In: *Sozialgesetzbuch*. Online verfügbar unter <https://www.sozialgesetzbuch-sgb.de/sgbxi/113a.html>, zuletzt geprüft am 08.05.2021.

Arons, Melissa M.; Hatfield, Kelly M.; Reddy, Sujan C.; Kimball, Anne; James, Allison; Jacobs, Jesica R. et al. (2020): Presymptomatic SARS-CoV-2 Infections and Transmission in a Skilled Nursing Facility. In: *The New England journal of medicine* 382 (22), S. 2081–2090. DOI: 10.1056/NEJMoa2008457.

BMFSFJ (2003): Gesetz über die Berufe in der Altenpflege. Bundesministeriums für Familie, Senioren Frauen und Jugend. In: *Bundesgesetzblatt Teil 1; Nr. 50*, S. 1509–1588. Online verfügbar unter <https://www.bmfsfj.de/resource/blob/155858/9b5aee6fc7e736e7063a2b3e9701efbb/alte-npflegegesetz-bgbl-gesetzestext-2000-data.pdf>.

BR (2021): Seniorenresidenz Schliersee. Altenheim: Verdacht auf Körperverletzung bei 88 Bewohnern Bayrischer Rundfunk. Online verfügbar unter <https://www.br.de/nachrichten/bayern/altenheim-verdacht-auf-koerperverletzung-bei-88-bewohnern,SSUO80n>, zuletzt geprüft am 24.04.2021.

Choi, S.L., Goh, C.F., Adam, M.B.H. et al. (2016): Transformational leadership, empowerment, and job satisfaction: the mediating role of employee empowerment. *Hum Resour Health* 14, 73 (2016). <https://doi.org/10.1186/s12960-016-0171-2>

DEGAM (2020): Handlungsempfehlung COVID-19-Ausbruch im Pflegeheim – zur Weitergabe an HausärztInnen und Pflegeheimleitungen (entwickelt für den Rhein-Neckar-Kreis, prinzipiell übertragbar auf andere Kreise) Stand 16.12.2020. Deutsche Gesellschaft für Allgemeinmedizin und Familienmedizin. Online verfügbar unter [https://www.degam.de/files/Inhalte/Degam-Inhalte/Aktuelles/2020/Toolbox%20Pflegeheime/201216\\_Versorgung\\_Pflegeheime\\_COVID\\_allgemein\\_Vers\\_1.1.pdf](https://www.degam.de/files/Inhalte/Degam-Inhalte/Aktuelles/2020/Toolbox%20Pflegeheime/201216_Versorgung_Pflegeheime_COVID_allgemein_Vers_1.1.pdf).

Focus online (2020): 22 Tote in Wolfsburger Altenheim: Anwalt beantragt Beweissicherung. Online verfügbar unter [https://www.focus.de/panorama/welt/jetzt-23-tote-in-pflegeheim-schon-23-covid-tote-in-wolfsburger-altenheim-anwalt-legt-nach-und-beantragt-beweissicherung\\_id\\_11839932.html](https://www.focus.de/panorama/welt/jetzt-23-tote-in-pflegeheim-schon-23-covid-tote-in-wolfsburger-altenheim-anwalt-legt-nach-und-beantragt-beweissicherung_id_11839932.html), zuletzt geprüft am 05.05.2021.

Goedhart, Nicole S.; van Oostveen, Catharina J.; Vermeulen, Hester (2017): The effect of structural empowerment of nurses on quality outcomes in hospitals: a scoping review. In: *Journal of nursing management* 25 (3), S. 194–206. DOI: 10.1111/jonm.12455.

Gordon, Adam L.; Goodman, Claire; Achterberg, Wilco; Barker, Robert O.; Burns, Eileen; Hanratty, Barbara et al. (2020): Commentary: COVID in care homes-challenges and dilemmas in healthcare delivery. In: *Age and ageing* 49 (5), S. 701–705. DOI: 10.1093/ageing/afaa113.

Graf von Stillfried, D.; Czihal, T.; Meer, A. (2019): Sachstandsbericht: Strukturierte medizinische Ersteinschätzung in Deutschland (SmED). In: *Notfall Rettungsmed* 22 (7), S. 578–588. DOI: 10.1007/s10049-019-0627-8.

Graham, Nsn; Junghans, C.; Downes, R.; Sendall, C.; Lai, H.; McKirdy, A. et al. (2020): SARS-CoV-2 infection, clinical features and outcome of COVID-19 in United Kingdom nursing homes. In: *The Journal of infection*. DOI: 10.1016/j.jinf.2020.05.073.

Huang, Chaolin; Wang, Yeming; Li, Xingwang; Ren, Lili; Zhao, Jianping; Hu, Yi et al. (2020): Clinical features of patients infected with 2019 novel coronavirus in Wuhan, China. In: *Lancet (London, England)* 395 (10223), S. 497–506. DOI: 10.1016/S0140-6736(20)30183-5.

Janda, Constanze (2019): *Pflegerecht*. 1. Aufl. Baden-Baden: Nomos Verlagsgesellschaft mbH & Co. KG.

Janda, Constanze (2020): Rechtsgutachten im Forschungsprojekt. Sektorenübergreifendes & integriertes Notfall- und Verfügungsmanagement für die letzte Lebensphase in stationärer Langzeitpflege (Novelle). Speyer: Unveröffentlicht.

Kampf, L. & Stadler, R. (2020): In der Falle. In: *Süddeutsche Zeitung Magazin* (41), S. 9–20.

Kimball, A.; Hatfield, K. M.; Arons, M.; James, A.; Taylor, J. et al (2020): Asymptomatic and Presymptomatic SARS-CoV-2 Infections in Residents of a Long-Term Care Skilled Nursing Facility — King County, Washington, March 2020. In: *MMWR. Morbidity and mortality weekly report* 69 (13), S. 377–381. DOI: 10.15585/mmwr.mm6912e2.

Kluge, Stefan; Janssens, Uwe; Welte, Tobias; Weber-Carstens, Steffen; Schälte, Gereon; Spinner, Christoph D. et al. (2020): Empfehlungen zur stationären Therapie von Patienten mit COVID-19. AWMF (Registernummer 113 - 001). Online verfügbar unter <https://www.awmf.org/leitlinien/detail/ll/113-001.html>, zuletzt geprüft am 07.01.2021.

Kluge, Stefan; Janssens, Uwe; Welte, Tobias; Weber-Carstens, Steffen; Schälte, Gereon; Spinner, Christoph D. et al. (2021): S3-Leitlinie - Empfehlungen zur stationären Therapie von P mit COVID-19. Stand 23.02.2021. Online verfügbar unter [https://www.awmf.org/uploads/tx\\_szleitlinien/113-001l\\_S3\\_Empfehlungen-zur-stationaeren-Therapie-von-Patienten-mit-COVID-19\\_\\_2021-04.pdf](https://www.awmf.org/uploads/tx_szleitlinien/113-001l_S3_Empfehlungen-zur-stationaeren-Therapie-von-Patienten-mit-COVID-19__2021-04.pdf), zuletzt geprüft am 12.05.2021.

Kofahl, R.; Jürchott, K., Hering, C., Gangnus, A., Kuhlmeier, A., Schwinger, A. (2021). Covid.19-Betroffenheit in der vollstationären Langzeitpflege. In: Jacobs, A., Kuhlmeier, A., Greß, S., Klauber, J., Schwinger, A. (Hrsg.): *Pflege-Report 2021. Sicherstellung der Pflege. Bedarfslagen und Anbotsstrukturen*. Springer, S. 3-58

PfIBG (2020): Gesetz über die Pflegeberufe (Pflegeberufegesetz - PfIBG). Bundesrecht - tagaktuell konsolidiert - alle Fassungen seit 2006. Online verfügbar unter <https://www.buzer.de/Pflegeberufegesetz-PfIBG.htm>, zuletzt geprüft am 08.05.2021.

RKI, Robert Koch Institut (2021): Prävention und Management von COVID-19 in Altenund Pflegeeinrichtungen und Einrichtungen für Menschen mit Beeinträchtigungen und Behinderungen. V.20, 07.04.2021. Online verfügbar unter [https://www.rki.de/DE/Content/InfAZ/N/Neuartiges\\_Coronavirus/Alten\\_Pflegeeinrichtung\\_Empfehlung.pdf?\\_\\_blob=publicationFile](https://www.rki.de/DE/Content/InfAZ/N/Neuartiges_Coronavirus/Alten_Pflegeeinrichtung_Empfehlung.pdf?__blob=publicationFile).

Rothgang, Heinz; Domhoff, Dominik; Friedrich, Anna-Carina; Heinze, Franziska; Preuss, Benedikt; Schmidt, Annika et al. (2020): Pflege in Zeiten von Corona: Zentrale Ergebnisse einer deutschlandweiten Querschnittsbefragung vollstationärer Pflegeheime. In: *Pflege* 33 (5), S. 265–275. DOI: 10.1024/1012-5302/a000760.

Shedden, R.; McCulloch, A.; Laidlaw, S.; Love, S.; McLuckie, S.; Jones, W. et al. (2021): 112 Outcomes and Clinical Characteristics of COVID-19 Disease in the Frail, Elderly Population of Tayside. In: *Age and ageing* 50 (Supplement\_1), i12-i42. DOI: 10.1093/ageing/afab030.73.

WHO (2021): Wöchentliche epidemiologische Aktualisierung der Weltgesundheitsorganisation Coronavirus (COVID-19) und wöchentliche operative Aktualisierung. Online verfügbar unter <https://www.who.int/emergencies/diseases/novel-coronavirus-2019/situation-reports/>, zuletzt geprüft am 05.05.2021.

Wolf-Ostermann, Karin; Rothgang, Heinz (2020): Zur Situation der Langzeitpflege in Deutschland während der Corona-Pandemie. Ergebnisse einer Online-Befragung in Einrichtungen der (teil)stationären und ambulanten Langzeitpflege. Online verfügbar unter [https://www.uni-bremen.de/fileadmin/user\\_upload/fachbereiche/fb11/Aktuelles/Corona/Ergebnisbericht\\_Coronabefragung\\_Uni-Bremen\\_24062020.pdf](https://www.uni-bremen.de/fileadmin/user_upload/fachbereiche/fb11/Aktuelles/Corona/Ergebnisbericht_Coronabefragung_Uni-Bremen_24062020.pdf).
